# Supplementary material for: Differences in Gene Expression Profiles between Early and Late Isolates in Monospecies Achromobacter Biofilm
Source: MDPI journal article supplement (doi:10.3390/pathogens6020020), 2017-05-19
Supplement: s1 [file s1]

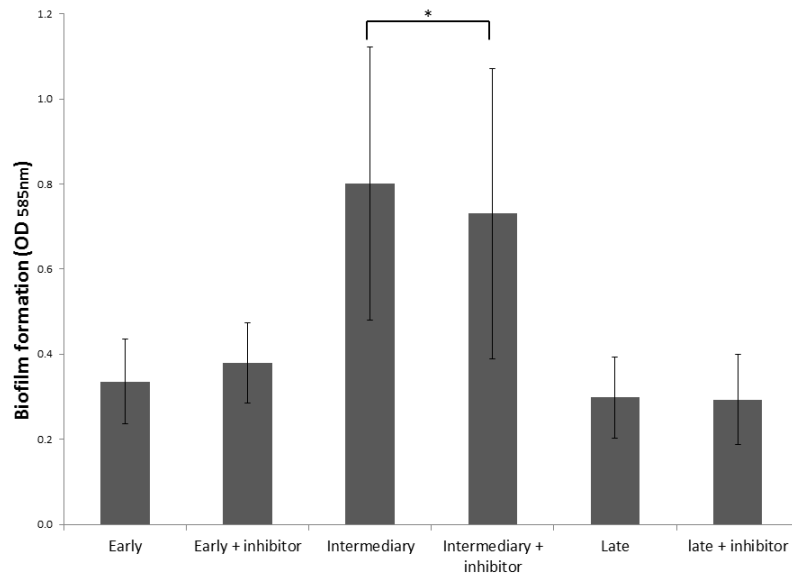

Figure S1. Biofilm formation in the presence and absence of efflux pump inhibitor Pa $\beta$ N

\* Statistically significant difference,  $p = 0.0004$

Overnight cultures were grown in BHI and adjusted to OD<sub>600</sub> = 0.1 with fresh BHI, and 160  $\mu$ L per well was added to 96 well micro titer plates. 100  $\mu$ g/mL of the efflux pump inhibitor phenylalanine arginyl  $\beta$ -naphthylamide (PA $\beta$ N) (Sigma-Aldrich) was added to the wells before peg-lids were inserted. After 24 h incubation at 37  $^{\circ}$ C, biofilm formation in the presence of each enzyme was quantified by crystal violet staining as described in Nielsen *et. al.* [9], and compared to controls with no addition of PA $\beta$ N. The experiments were carried out three times with eight replicates in each experiment.
