# Supplementary material for: Differences in Gene Expression Profiles between Early and Late Isolates in Monospecies Achromobacter Biofilm
Source: MDPI journal article supplement (doi:10.3390/pathogens6020020), 2017-05-19
Supplement: s1 [file s1]

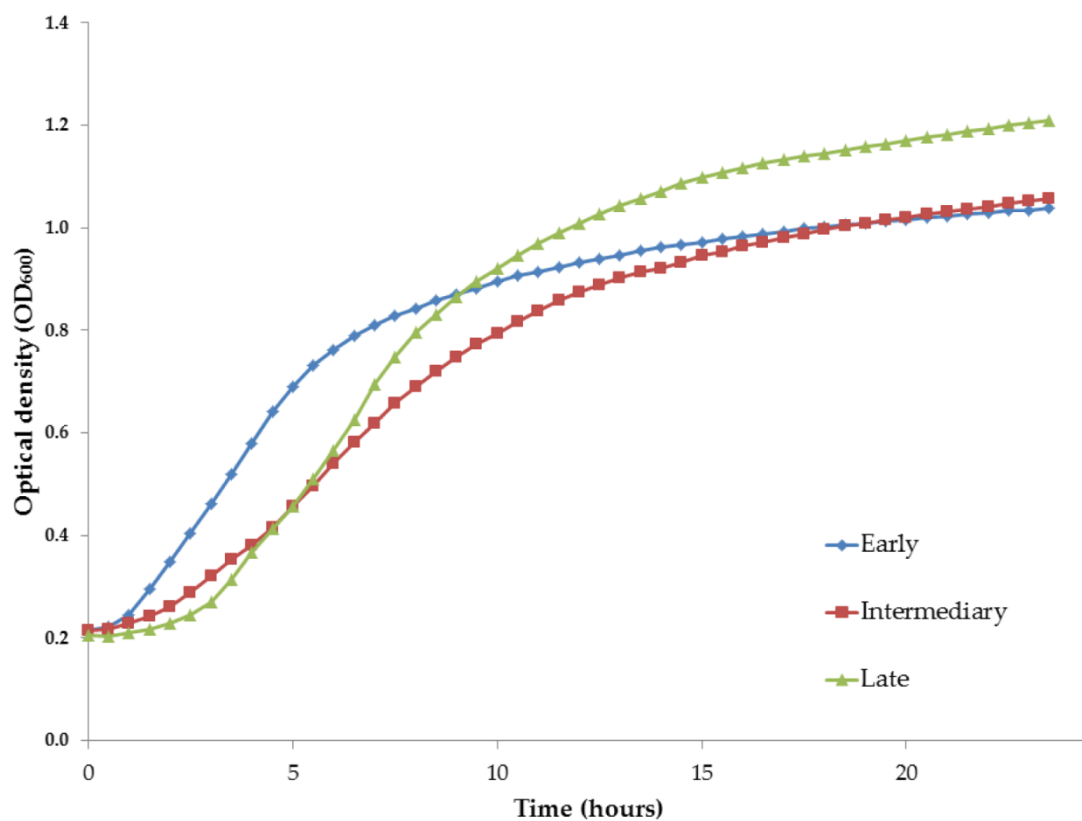

Figure S2. Growth curves of early, intermediary and late isolates of *A. xylosoxidans*

Growth rates of the early, intermediary and late isolates were determined by optical density measurements at 600 nm in 96 well plates with 200  $\mu$ L per well. Isolates were cultured in BHI media at 37°C with continuous shaking. Measurements were taken every 30 min using a Multiskan™ GO Microplate Spectrophotometer (Thermo Fisher Scientific) in kinetic mode.
