# Supplementary material for: Differences in Gene Expression Profiles between Early and Late Isolates in Monospecies Achromobacter Biofilm
Source: Pathogens. 2017 May 19;6(2):20. doi: 10.3390/pathogens6020020 (PMC5488654; doi:10.3390/pathogens6020020)
Supplement: Supplementary file 1 [file pathogens-06-00020-s001.zip › Table S1.xlsx]

## Sheet: Ark1
Category	Function	Role	Feature ID	Fold change	Early 1 (RPKM)	Early 2 (RPKM)	Early 3 (RPKM)	Late 1 (RPKM)	Late 2 (RPKM)	Late 3 (RPKM)
Amino acids and derivatives	Aromatic amino acids and derivatives	Tryptophan synthesis	Tryptophan synthase beta chain (EC 4.2.1.20)_2	-10.6519	523.131	527.454	541.726	50.6383	22.527	23.1072
Amino acids and derivatives	Lysine, threonine, methionine, and cysteine		L-Proline/Glycine betaine transporter ProP_3	-7.69461	88.9834	56.4589	108.62	6.80346	6.25058	7.2715
Amino acids and derivatives	Arginine; urea cycle, polyamines	Polyamine metabolism	S-adenosylmethionine decarboxylase proenzyme (EC 4.1.1.50), prokaryotic class 1B	-7.07099	106.779	51.2506	70.4646	10.8247	5.42457	3.82841
Amino acids and derivatives	Glutamine, glutamate, aspartate, aspargine; ammonia assimilation	Glutamate and aspartate uptake in bacteria	Glutamate Aspartate transport system permease protein GltJ (TC 3.A.1.3.4)_4	-6.79557	44.1735	28.7369	34.5346	2.21414	2.71228	4.64879
Amino acids and derivatives	Glutamine, glutamate, aspartate, aspargine; ammonia assimilation	Glutamate and aspartate uptake in bacteria	Glutamate Aspartate transport ATP-binding protein GltL (TC 3.A.1.3.4)_2	-6.713	90.3431	80.1751	106.756	14.5109	5.24524	6.34603
Amino acids and derivatives	Aromatic amino acids and derivatives	Chorismate synthesis	shikimate transporter ShiA	-6.29843	114.4	48.8253	74.9018	9.74623	4.29802	9.38893
Amino acids and derivatives	Arginine; urea cycle, polyamines	Polyamine metabolism	Spermidine Putrescine ABC transporter permease component PotB (TC 3.A.1.11.1)	-6.23246	62.408	50.8522	55.5239	8.74704	4.48533	3.61776
Amino acids and derivatives	Lysine, threonine, methionine and cysteine	Threonine and homoserine biosynthesis	Transcriptional regulator, GntR family domain / Aspartate aminotransferase (EC 2.6.1.1)_9	-6.20354	44.5082	82.032	58.8858	7.31793	5.3786	5.96509
Amino acids and derivatives	Lysine, threonine, methionine and cysteine	Threonine and homoserine biosynthesis	Threonine synthase (EC 4.2.3.1)_2	-6.1346	87.4692	79.2254	88.5411	12.1112	4.91324	9.09136
Amino acids and derivatives	Lysine, threonine, methionine and cysteine	Threonine and homoserine biosynthesis	Transcriptional regulator, GntR family domain / Aspartate aminotransferase (EC 2.6.1.1)_5	-5.9565	112.324	79.7478	97.0819	10.5982	10.6222	8.70146
Amino acids and derivatives	Aromatic amino acids and derivatives	Tryptophan synthesis	Tryptophan synthase alpha chain (EC 4.2.1.20)_2	-5.30624	317.527	154.873	174.694	36.8513	19.7649	19.9274
Amino acids and derivatives	Aromatic amino acids and derivatives	Tryptophan synthesis	Tryptophan synthase beta chain (EC 4.2.1.20)_3	-5.28031	218.548	191.549	207.243	40.2974	19.3928	14.9308
Amino acids and derivatives	histidine metabolism	Histidine biosynthesis	Histidinol-phosphate aminotransferase (EC 2.6.1.9)_2	-4.72559	247.845	149.186	182.63	31.0478	19.6107	25.8833
Amino acids and derivatives	Aromatic amino acids and derivatives	Chorismate synthesis	Shikimate 5-dehydrogenase I alpha (EC 1.1.1.25)_2	4.62677	33.7006	51.012	45.5523	211.297	86.7626	96.8226
Amino acids and derivatives	Lysine, threonine, methionine, and cysteine	Methionine biosynthesis	5,10-methylenetetrahydrofolate reductase (EC 1.5.1.20)_2	4.81727	1.22662	5.12204	3.45023	13.5314	6.97924	10.5549
Amino acids and derivatives	Lysine, threonine, methionine, and cysteine	Lysine biosynthesis DAP pathway	4-hydroxy-tetrahydrodipicolinate synthase (EC 4.3.3.7)_4	5.1293	68.3632	86.0683	81.1107	257.597	172.393	331.286
Amino acids and derivatives	Lysine, threonine, methionine, and cysteine	Methionine biosynthesis	Cystathionine beta-lyase/cystathionine gamma-synthase, MetC	5.61235	428.479	1517.44	1175.17	6439.36	2927.39	2224.89
Amino acids and derivatives	Arginine; urea cycle, polyamines	Arginine and Ornithine degradation	Ornithine cyclodeaminase (EC 4.3.1.12)_3	6.18253	107.276	58.1876	94.4316	135.615	272.892	547.224
Amino acids and derivatives	Arginine; urea cycle, polyamines	Arginine biosynthesis	N-acetylglutamate synthase (EC 2.3.1.1)	12.3238	152.34	207.252	148.118	690.305	2569.29	251.86
Amino acids and derivatives	Lysine, threonine, methionine, and cysteine	Methionine biosynthesis	5-methyltetrahydrofolate--homocysteine methyltransferase (EC 2.1.1.13)	15.6944	249.929	254.568	203.711	743.347	5043.59	238.154
Amino acids and derivatives	Aromatic amino acids and derivatives	Tryptophan synthesis	Tryptophan synthase beta chain (EC 4.2.1.20)_1	16.0365	34.2296	35.285	27.0403	752.238	158.275	153.701
Amino acids and derivatives	Lysine, threonine, methionine, and cysteine	Methionine biosynthesis	5-methyltetrahydropteroyltriglutamate-- homocysteine methyltransferase (EC 2.1.1.14)_1	16.3036	112.562	182.148	144.799	1136.88	1292.76	1975.97
Amino acids and derivatives	Aromatic amino acids and derivatives	Tryptophan synthesis	Tryptophan synthase alpha chain (EC 4.2.1.20)_1	16.3695	9.15467	8.27414	6.49308	202.141	42.4719	28.1165
Amino acids and derivatives	Branched-chain amino acids	Leucine degradation and HMG-CoA metabolism	Dihydrolipoamide dehydrogenase (EC 1.8.1.4)	17.0502	19.5613	19.1353	26.1582	48.1935	232.758	369.507
Amino acids and derivatives	Arginine; urea cycle polyamines	Urea decomposition	Allophanate hydrolase (EC 3.5.1.54)	36.583	13.1445	23.203	11.7565	141.894	801.913	31.8375
Amino acids and derivatives	Branched-chain amino acids	Isoleucine degradation	3-ketoacyl-CoA thiolase (EC 2.3.1.16)_3	-11.135	1547.21	667.248	1330.48	131.062	37.0495	42.0639
Amino acids and derivatives	Branched-chain amino acids	Isoleucine degradation	3-ketoacyl-CoA thiolase (EC 2.3.1.16) @ Acetyl-CoA acetyltransferase (EC 2.3.1.9)_3	5.32588	166.586	134.952	182.951	673.048	430.97	523.939
Carbohydrates	Organic acids	Tricarballyate utilization	TcuB: works with TcuA to oxidize tricarballylate to cis-aconitate	-12.6878	81.7819	31.6158	52.7219	4.16325	1.84652	1.91489
Carbohydrates	Central carbohydrate metabolism	Entner-Doudroff pathway / Pentose phosphate pathway	6-phosphogluconolactonase (EC 3.1.1.31)	-7.69594	975.387	608.74	832.927	120.429	36.7795	49.0951
Carbohydrates	Central carbohydrate metabolism	Dehydrogenase complexes	Leucine-, isoleucine-, valine-, threonine-, and alanine-binding protein_11	-5.54356	104.296	36.9416	119.278	10.65	3.96672	14.7175
Carbohydrates	Carbohydrates	Central carbohydrate metabolism	Acetate permease ActP (cation/acetate symporter)	-5.25305	267.838	163.04	280.784	25.8972	21.368	36.395
Carbohydrates	Fermentation	Acetoacetate synthase subunits / Branched-chain amino acid biosynthesis	Acetolactate synthase large subunit (EC 2.2.1.6)_1	7.29847	148.132	142.693	162.018	1045.87	485.151	604.76
Carbohydrates	One-carbon metabolism	Serine-glyoxylate cycle	Isocitrate lyase (EC 4.1.3.1)	13.1859	533.14	662.029	3596.7	19418.3	9952.37	11598.2
Cell division and cell cycle	Cell division and cell cycle	Bacterial cytoskeleton	Rod shape-determining protein MreD	-5.44342	398.826	348.733	431.336	51.508	41.7549	41.4246
Cell division and cell cycle	Cell division and cell cycle	Bacterial cytoskeleton	Septum formation protein Maf	-4.8538	201.327	91.5118	97.9528	27.801	14.9639	7.80356
Cell wall and capsule	Capsular and extracellular polysaccharides	Sialic acid metabolism	TRAP-type transport system, periplasmic component, predicted N-acetylneuraminate-binding protein_1	-6.2263	961.139	901.091	981.334	196.478	70.8314	35.6754
Cell wall and capsule	Cell wall and capsule		UDP-galactose-lipid carrier transferase (EC 2.-.-.-)_1	-5.76998	94.8323	93.056	90.0028	13.1262	7.2357	9.79639
Cell wall and capsule	Capsular and extracellular polysaccharides	Sialic acid metabolism	TRAP-type transport system, large permease component, predicted N-acetylneuraminate transporter_2	-5.22983	154.517	115.925	151.035	22.4066	17.102	10.7287
Cell wall and capsule	Capsular and extracellular polysaccharides	Sialic acid metabolism	Transcriptional regulator NanR	5.1896	117.395	113.574	143.536	642.948	271.381	349.903
Cell wall and capsule			Exopolysaccharide biosynthesis glycosyltransferase EpsF (EC 2.4.1.-)	5.92014	16.4293	15.2523	25.8645	72.6291	54.7345	86.869
Cell wall and capsule			outer membrane efflux protein	6.04376	3.46303	6.92852	2.90097	25.8208	12.9631	13.9584
Cell wall and capsule	Capsular and extracellular polysaccharides		Capsular polysaccharide ABC transporter, ATP-binding protein KpsT	6.58446	20.4657	18.1761	21.6072	50.0694	153.335	23.6599
Cell wall and capsule			Outer membrane lipoprotein_3	7.59971	313.17	255.965	356.148	953.295	1158.53	2163.06
Cell wall and capsule	Gram-negative cell wall components	Lipopolysaccharide assembly	Uncharacterized ABC transporter, auxiliary component YrbC	8.79545	1230.02	2425.25	856.698	5769.39	4843.17	14142.8
Cell wall and capsule	Cell wall and capsule	Murein hydrolases	Membrane-bound lytic murein transglycosylase A precursor (EC 3.2.1.-)	9.15838	252.803	216.924	197.847	529.676	2632.99	191.524
Cell wall and capsule		Serine protease with cytotoxic effect. Disrupts actin cytoskeleton resulting cell detachment in vitro	EspP	11.4678	1.53645	4.01171	2.92329	9.9911	43.1276	4.75952
Cell wall and capsule	Cell wall and capsule	Peptidoglycan biosynthesis	D-alanyl-D-alanine carboxypeptidase (EC 3.4.16.4)_2	24.671	80.0326	125.062	55.2619	642.617	2793.99	134.427
Cell wall and capsule			outer membrane autotransporter	35.6513	48.7191	63.0802	17.3908	386.206	2067.77	73.5571
Cofactors, vitamins, Prosthetic groups, pigments	Coenzyme A biosynthesis	Coenzyme A biosynthesis cluster	Pantothenate kinase type III, CoaX-like (EC 2.7.1.33)	-7.68595	533.68	313.191	431.502	53.7156	25.9532	26.1666
Cofactors, vitamins, Prosthetic groups, pigments	Cofactors, vitamins, Prosthetic groups, pigments	Thiamin biosynthesis	Hydroxymethylpyrimidine ABC transporter, transmembrane component	-5.07717	99.0188	84.2801	104.74	17.5386	6.82446	11.4676
Cofactors, vitamins, Prosthetic groups, pigments	Biotin		Biotin--protein ligase (EC 6.3.4.9, EC 6.3.4.10, EC 6.3.4.11, EC 6.3.4.15)	-4.99842	260.971	124.161	156.987	29.3229	17.4318	20.8504
Cofactors, vitamins, Prosthetic groups, pigments / Metabolism of aromatic compounds	Folate and pterines / Metabolism of aromatic compounds	Homogentisate pathway of aromatic compound degradation / Pterin carbolamnie dehydratase / Salicylate and gentistate catabolism	Maleylacetoacetate isomerase (EC 5.2.1.2) @ Glutathione S-transferase, zeta (EC 2.5.1.18)_1	-14.0078	114.863	52.8851	88.5254	3.24325	0.993231	6.90963
Cofactors, vitamins, Prosthetic groups, pigments / Metabolism of aromatic compounds	NAD and NADP	NAD and NADP cofactor biosynthesis global	Nicotinate-nucleotide adenylyltransferase (EC 2.7.7.18)	-4.85191	174.718	108.825	109.531	21.7348	11.3335	17.6297
DNA metabolism	DNA repair	DNA repair, bacterial RecFOR pathway	DNA recombination and repair protein RecO	-6.68228	531.679	312.638	365.763	38.1341	36.3826	36.2741
DNA metabolism	DNA recombination	RuvABC plus a hypothetical	Crossover junction endodeoxyribonuclease RuvC (EC 3.1.22.4)	-6.51143	458.985	274.539	339.445	44.0409	25.4332	33.9178
DNA metabolism	DNA recombination	RuvABC plus a hypothetical	Holliday junction DNA helicase RuvA	-5.9419	203.625	182.087	208.342	27.4276	16.0607	19.4313
DNA metabolism			DNA topoisomerase III (EC 5.99.1.2) in PFGI-1-like cluster_1	10.8552	0.77578	1.78728	0.912377	5.40502	15.922	3.81456
DNA metabolism			DNA-binding response regulator ColR	19.2003	15.0033	21.0397	15.3946	155.534	397.135	17.1199
Fatty acids, lipids, and isoprenoids	Fatty acids	Fatty acid biosynthesis FASII	Acetyl-coenzyme A carboxyl transferase beta chain (EC 6.4.1.2)	-4.75528	188.956	175.417	200.307	33.5976	19.4951	21.8393
Fatty acids, lipids and isoprenoids	Fatty acids	Fatty acid biosynthesis FASII	3-oxoacyl-[acyl-carrier protein] reductase (EC 1.1.1.100)_16	-6.54573	662.673	244.417	416.488	59.5682	31.0394	36.5652
Fatty acids, lipids and isoprenoids	Fatty acids, lipids and isoprenoids	Acetyl-CoA fermentation to Butyrate / Polyhydroxybutyrate metabolism	Enoyl-CoA hydratase (EC 4.2.1.17)_15	-5.23938	72.9776	37.0233	63.3649	10.733	2.86858	7.15811
Fatty acids, lipids and isoprenoids	Fatty acids	Fatty acid biosynthesis FASII	Biotin carboxylase of acetyl-CoA carboxylase (EC 6.3.4.14)	-4.79435	1155.96	654.196	734.464	120.777	97.2979	109.024
Fatty acids, lipids and isoprenoids	Fatty acids	Fatty acid biosynthesis FASII	Malonyl CoA-acyl carrier protein transacylase (EC 2.3.1.39)_2	-4.57981	283.251	167.299	234.911	42.3359	18.9377	33.4978
Fatty acids, lipids and isoprenoids	Fatty acids, lipids and isoprenoids	Polyhydroxy butyrate metabolism	D-beta-hydroxybutyrate dehydrogenase (EC 1.1.1.30)_4	-4.5206	116.348	43.9372	100.453	16.5693	8.58723	10.8616
Fatty acids, lipids and isoprenoids	Fatty acids, lipids and isoprenoids	Acetyl-CoA fermentation to Butyrate / Polyhydroxybutyrate metabolism	Enoyl-CoA hydratase (EC 4.2.1.17)_3	4.59005	44.2572	54.449	41.1441	129.12	125.479	142.745
Fatty acids, lipids and isoprenoids	Phospholipids	Glycerolipid and glycerophospholipid metabolism in bacteria	Aldehyde dehydrogenase B (EC 1.2.1.22)	5.30867	66.0519	123.791	139.711	758.722	223.593	202.441
Fatty acids, lipids and isoprenoids	Phospholipids	Glycerolipis and glycerophospholipid metabolism in bacteria	Acyl carrier protein_3	5.53206	275.147	287.502	396.913	266.97	1221.75	1602.13
Fatty acids, lipids and isoprenoids	Phospholipids	Glycerolipid and glycerophospholipid metabolism in bacteria	Aldehyde dehydrogenase (EC 1.2.1.3)_1	6.19258	227.612	77.0956	233.838	714.63	463.976	896.978
Fatty acids, lipids and isoprenoids	Fatty acids	Fatty acid biosynthesis FASII	Enoyl-[acyl-carrier-protein] reductase [NADH] (EC 1.3.1.9)_2	31.8405	952.465	845.827	216.249	6645.95	27662.5	896.592
Fatty acids, lipids and isoprenoids / Cofactors, vitamins, Prosthetic groups, pigments	Fatty acids	Fatty acid metabolism cluster	Long-chain-fatty-acid--CoA ligase (EC 6.2.1.3)_10	-8.21285	972.252	500	782.235	91.4113	40.0804	44.4925
Fatty acids, lipids, and isoprenoids	phospholipids		Glycerol kinase (EC 2.7.1.30)_2	-5.02245	158.295	68.2956	129.522	11.4462	12.9904	18.7103
Fatty acids, lipids, and isoprenoids			2,4-dienoyl-CoA reductase, mitochondrial precursor (EC 1.3.1.34)	34.5219	62.8376	113.073	41.766	774.67	3271.75	146.109
Iron acquisition and metabolism	Sideophores	Iron sideophore sensor and receptor system	FIG006045: Sigma factor, ECF subfamily_1	-6.23076	82.3479	59.9107	75.3675	10.9485	6.48951	4.31829
Iron acquisition and metabolism	Sideophores	Sideophore assembly kit	ABC-type Fe3+-siderophore transport system, ATPase component	-6.00816	161.032	93.4492	119.324	10.4669	10.0009	17.6843
Iron acquisition and metabolism	Iron acquisition and metabolism	Iron acquisition	Ferric iron ABC transporter, permease protein_1	-4.59065	135.256	72.9366	122.663	17.7292	9.9647	17.2724
Iron acquisition and metabolism / Membrane transport	Iron acquisition and metabolism / Membrane transport	Hemin transport system / Ton and Tol transport systems	Ferric siderophore transport system, periplasmic binding protein TonB_2	10.8454	5.31172	7.55839	7.3739	18.6249	97.3345	8.60359
Membrane transport	TRAP transporters	TRAP transporter unknown substrate 5	TRAP dicarboxylate transporter, DctQ subunit, unknown substrate 3	-31.1125	209.648	136.236	188.85	4.22814	2.98811	3.25369
Membrane transport	TRAP transporters	TRAP transporter unknown substrate 8	TRAP transporter solute receptor, unknown substrate 3	-20.3308	379.766	254.052	328.187	15.1411	7.53495	7.01251
Membrane transport	ABC transporters	ABC transporter dipeptide	Dipeptide transport system permease protein DppC (TC 3.A.1.5.2)_7	-11.5182	70.9023	72.2217	91.1974	6.55081	2.55329	3.53044
Membrane transport	TRAP transporters	TRAP transporter collection	TRAP-type C4-dicarboxylate transport system, large permease component_3	-9.52379	483.715	384.073	393.035	67.9488	14.6158	7.0433
Membrane transport	TRAP transporters	TRAP transporter collection	TRAP-type C4-dicarboxylate transport system, small permease component	-8.02395	490.762	510.657	351.539	54.7053	29.2207	23.6866
Membrane transport	ABC transporters		Xylose ABC transporter, periplasmic xylose-binding protein XylF	-7.96152	1139.26	1071.78	908.014	190.025	42.1244	34.5428
Membrane transport	Membrane transport	Tricarboxylate transport system	Tricarboxylate transport protein TctB_1	-7.88035	53.0495	40.9212	64.7299	4.76676	4.71626	2.85302
Membrane transport	Protein secretion system, type IV	Type IV secretion systems	Uncharacterized protein ImpF	-5.59786	657.112	256.721	548.717	70.0052	68.5605	20.5397
Membrane transport	ABC transporters		Xylose ABC transporter, permease protein XylH	-5.45865	1043.63	645.816	814.109	167.761	65.7112	64.4739
Membrane transport	Membrane transport	Tricarboxylate transport system	Tricarboxylate transport membrane protein TctA_5	-5.1671	53.0649	50.3347	51.1778	8.83914	5.62212	4.15678
Membrane transport	ABC transporters	ABC transporter branched-chain amino acid	High-affinity branched-chain amino acid transport system permease protein LivH (TC 3.A.1.4.1)_16	-5.10173	111.546	67.3056	98.5765	11.284	7.73136	14.6686
Membrane transport	Membrane transport	Tricarboxylate transport system	Tricarboxylate transport membrane protein TctA_1	-4.54725	166.371	99.1828	174.939	21.5597	17.8373	20.5769
Membrane transport	ABC transporters	ABC transporter branched-chain amino acid	Branched-chain amino acid transport system permease protein LivM (TC 3.A.1.4.1)_6	-4.5134	45.7712	37.6235	39.4491	8.22396	2.57214	6.22387
Membrane transport	Cation transporters	Magnesium transport	Mg(2+) transport ATPase, P-type (EC 3.6.3.2)_2	4.54002	2.57817	7.70306	5.17356	20.5822	10.5435	14.5587
Membrane transport	Protein secretion, type I	Type I secretion system for aggregation	Type I secretion system, membrane fusion protein LapC_1	4.67688	23.2152	35.5474	25.1719	50.5544	150.883	24.5238
Membrane transport	Membrane transport	Tricarboxylate transport system	Tricarboxylate transport protein TctC_4	5.41712	9.43425	12.1461	10.7212	46.0542	24.9449	41.2587
Membrane transport	ABC transporters		ABC transporter ATP-binding protein with unknown substrate_1	7.50491	28.4767	46.0602	35.469	87.2654	155.73	256.718
Membrane transport	Membrane transport	Ton and Tol transport systems	TolA protein_3	7.72208	22.5748	22.9451	47.1301	135.695	118.372	191.968
Membrane transport	Uni- sym- and antiporters	NhaA, NhaD and soduim-dependent phosphate transporters	Na+/H+ antiporter NhaA type_1	8.01512	255.637	974.044	625.294	1946.02	3005.63	4140.63
Membrane transport	ABC transporters		ABC transporter ATP-binding protein with unknown substrate_2	11.0489	87.2403	160.491	97.9845	707.837	647.434	1023.58
Membrane transport	ABC transporters	ABC transporter oligopeptide	oligopeptide transporter	12.8836	681.905	707.896	797.651	3622.66	10197.3	2287.85
Membrane transport	ABC transporters	ABC transporter branched-chain amino acid	Branched-chain amino acid transport ATP-binding protein LivF (TC 3.A.1.4.1)_11	13.7598	11.1546	18.56	12.2441	36.9393	269.737	11.1981
Membrane transport	ABC transporters	ABC transporter branched-chain amino acid	Branched-chain amino acid transport ATP-binding protein LivG (TC 3.A.1.4.1)_12	17.5892	140.104	132.401	75.1095	444.125	2769.16	100.972
Membrane transport	Membrane transport	Tricarboxylate transport system	Tricarboxylate transport protein TctC_48	19.2201	2.32388	1.60616	2.16823	32.202	22.8086	23.796
Membrane transport	ABC transporters	ABC transporter branched-chain amino acid	High-affinity branched-chain amino acid transport system permease protein LivH (TC 3.A.1.4.1)_3	22.9056	43.0336	58.6993	35.9963	163.455	1479.52	62.7304
Membrane transport	ABC transporters	ABC transporter branched-chain amino acid	Branched-chain amino acid transport system permease protein LivM (TC 3.A.1.4.1)_16	28.9379	117.961	157.913	86.5823	802.362	4737.25	195.647
Membrane transport	Membrane transport	Ton and Tol transport systems	Biopolymer transport protein ExbD/TolR_2	45.4423	2.12469	4.89496	3.20679	34.5406	220.625	10.9696
Membrane transport / Iron acquisition and metabolism	Membrane transport / hemin transport system	Ton and Tol transport systems / TonB dependent hemin, ferrichrome receptor	TonB-dependent siderophore receptor_1	6.88994	7.28866	28.535	23.353	87.686	58.4237	114.163
Metabolism of aromatic compounds	Metabolism of central aromatic intermediates	Catechol branch of beta-ketoadipate pathway	Mandelate racemase (EC 5.1.2.2)	-8.89098	159.854	114.362	151.564	13.8398	6.49283	9.65565
Metabolism of aromatic compounds	Metabolism of central aromatic intermediates	Catechol branch of beta-ketoadipate pathway	3-oxoadipate CoA-transferase subunit B (EC 2.8.3.6)_2	-5.37649	81.4877	66.648	89.6375	5.91818	8.8973	12.2596
Metabolism of aromatic compounds	Metabolism of aromatic compounds	Benzoate transport and degradation cluster	Benzoate transport related protein	-4.51813	165.3	77.641	94.6204	21.561	11.8853	13.1813
Metabolism of aromatic compounds	Metabolism of aromatic compounds	Gentisate degradation	Gentisate 1,2-dioxygenase (EC 1.13.11.4)_2	5.40179	72.5793	125.98	100.565	369.662	258.665	393.32
Metabolism of aromatic compounds	Metabolism of aromatic compounds	Aromatic amin catabolism	Phenylacetaldehyde dehydrogenase (EC 1.2.1.39)	8.54327	93.2877	76.5506	108.728	884.46	289.368	398.183
Metabolism of aromatic compounds	degradation of aromatic compounds		carboxymuconolactone decarboxylase	20.3632	26.2585	36.2973	19.5998	122.616	762.566	32.5369
Motility and chemotaxis	Flagellar motility in prokaryota	Flagellum	Flagellum-specific ATP synthase FliI_2	-11.3121	197.467	85.6617	128.14	11.2802	5.24131	6.05303
Motility and chemotaxis	Flagellar motility in prokaryota	Flagellum	Flagellar motor rotation protein MotB_5	-5.54587	161.631	115.585	154.123	23.658	11.1092	14.3172
Motility and chemotaxis / RNA metabolism			RNA polymerase sigma-70 factor, ECF subfamily_2	-6.02337	148.125	96.5431	136.34	10.2688	13.1509	15.219
Nitrogen metabolism	Nitrogen metabolism	Cyanate hydrolysis	Cyanate ABC transporter, permease protein_2	7.15178	48.8181	154.53	86.0317	399.247	431.107	455.52
Nitrogen metabolism	Denitrification	Denitrifying reductase gene clusters	Respiratory nitrate reductase gamma chain (EC 1.7.99.4)	46.0209	100.783	105.762	14.1416	831.198	4522.98	179.338
Nucleosides and nucleotides	Purines	De Novo purine biosynthesis	Phosphoribosylaminoimidazole carboxylase ATPase subunit (EC 4.1.1.21)	4.81284	193.496	203.797	333.911	425.74	860.088	803.008
Nucleosides and nucleotides	Purines	Purine utilization	Xanthine transporter,putative_3	8.74328	104.494	183.666	165.265	284.861	638.583	1467.5
Nucleosides and nucleotides / Amino acids and derivatives	Pyrimidines / Amino acids and derivatives	Pyrimidine conversion / Creatine and Creatinine degradation	Cytosine deaminase (EC 3.5.4.1)_1	-4.87347	136.83	105.717	111.877	22.6207	8.96011	14.454
Phages, prophages, transposable elements, plasmids	Phages, prophages		Phage head maturation protease	-14.3582	20.035	20.7917	22.1899	1.67673	0.513491	0.310627
Phages, prophages, transposable elements, plasmids	Phages, prophages	Phage tail fiber protein	Phage tail assembly protein I_1	-7.53472	102.578	28.6257	118.339	7.52141	6.91019	5.78796
Phages, prophages, transposable elements, plasmids	Phages, prophages		Phage protein_8	43.996	2.32388	3.65036	1.15948	23.2234	152.658	6.18077
Phages, prophages, transposable elements, plasmids	Phages, prophages		Phage-related protein_2	51.4963	23.4277	50.6658	18.333	317.091	2210.4	85.9692
Phages, prophages, transposable elements, plasmids	Phages, prophages		phage-related integrase	133.428	2.11326	3.75017	4.57665	264.493	233.169	403.102
Potassium metabolism	Potassium metabolism	Potassium homeostasis	Osmosensitive K+ channel histidine kinase KdpD (EC 2.7.3.-)_2	8.71582	50.3498	51.2218	43.3618	92.9512	569.772	27.0008
Potassium metabolism	Potassium metabolism	Potassium homeostasis	Osmosensitive K+ channel histidine kinase KdpD (EC 2.7.3.-)_5	65.0466	42.9727	57.4004	40.1446	1346.24	1802.58	2415.33
Potassium metabolism	Potassium metabolism	Potassium homeostasis	Osmosensitive K+ channel histidine kinase KdpD (EC 2.7.3.-)_4	67.8689	19.3855	19.0359	19.8836	607.988	634.674	1200.66
Potassium metabolism	Potassium metabolism	Potassium homeostasis	Osmosensitive K+ channel histidine kinase KdpD (EC 2.7.3.-)_3	128.041	25.6797	35.4356	34.0603	1017.58	1877.39	4497.66
Protein metabolism	protein biosynthesis	programmed frameshift / Translation termination factors bacterial	Peptide chain release factor 2; programmed frameshift-containing	6.30967	281.892	357.161	324.882	657.343	2217.85	584.831
Protein metabolism	Protein degradation	Protein degradation	Oligopeptidase A (EC 3.4.24.70)	7.85681	127.088	183.01	124.04	193.007	592.608	1246.26
Protein metabolism	Protein degradation	PutativeTldE-TldD proteolytic complex	FIG138315: Putative alpha helix protein	16.717	336.061	386.648	303.538	1028.36	7846.15	410.859
Protein metabolism	Protein processing and modification	Peptide methionine sulfoxide reductase	Peptide methionine sulfoxide reductase MsrA (EC 1.8.4.11)_1	201.187	33.033	38.0515	47.8203	4632.84	3747.21	6576.05
Protein metabolism	Protein processing and modification	Peptide methionine sulfoxide reductase	Peptide methionine sulfoxide reductase MsrB (EC 1.8.4.12)_2	756.063	12.6909	14.6189	10.9977	6280.06	4523.16	7536.16
Protein metabolism / Cell wall and capsule	Protein processing and modification / Capsular and extracellular polysaccharides	N-linked glycosylation in bacteria / Rhamnose containing glycans	UDP-glucose 4-epimerase (EC 5.1.3.2)_7	-9.43785	783.147	404.357	567.498	84.2686	23.6611	15.3658
Regulation and cell signaling	Programmed cell death and toxin-antitoxin systems		Holin-like protein CidA	-15.0753	131.652	106.919	116.092	4.69071	3.13419	6.63591
Regulation and cell signaling	Regulation and cell signaling	LysR-family proteins	LysR-family transcriptional regulator_7	-14.5703	216.045	120.934	139.513	10.7234	3.80252	5.85522
Regulation and cell signaling	Regulation and cell signaling	TetR-family proteins	Transcriptional regulator, TetR family_14	-6.46256	356.222	351.004	550.885	76.6634	28.8957	22.1621
Regulation and cell signaling	Regulation and cell signaling	LysR-family proteins	Transcriptional regulator, LysR family_27	-5.04494	170.255	84.9573	125.663	13.2557	12.1785	20.8386
Regulation and cell signaling	Regulation and cell signaling	TetR-family proteins	Transcriptional regulator, TetR family_11	4.75753	47.4071	50.1121	44.2828	110.818	121.646	181.729
Regulation and cell signaling	Regulation and cell signaling	IclR-family proteins	Transcriptional regulator, IclR family_2	4.78457	121.975	152.868	143.843	497.516	262.298	519.197
Regulation and cell signaling	Regulation and cell signaling	Global two-component regulator	sensor histidine kinase_8	4.96031	35.5044	45.6705	36.9052	66.7913	236.785	27.9879
Regulation and cell signaling	Regulation and cell signaling	LysR-family proteins	LysR family transcriptional regulator STM3121_1	5.75702	46.8172	57.0604	56.0001	197.375	145.842	234.485
Regulation and cell signaling	Regulation and cell signaling	ArsR-family proteins	Transcriptional regulator, ArsR family_5	6.08548	85.7796	92.4245	68.3808	118.67	221.765	563.554
Regulation and cell signaling	Regulation and cell signaling	ArsR-family proteins	Transcriptional regulator, ArsR family_2	6.88714	79.8725	276.418	159.098	799.552	598.435	856.151
Regulation and cell signaling	Regulation and cell signaling	MarR-family proteins	Transcriptional regulator, PadR family	23.0857	142.293	238.315	148.473	936.398	5460.84	319.536
Regulation and cell signaling	Regulation and cell signaling	LysR-family proteins	LysR family transcriptional regulator STM2281	24.7862	11.0782	20.8287	11.4614	110.404	465.138	30.8989
Regulation and cell signaling	Regulation and cell signaling	TetR-family proteins	Transcriptional regulator, TetR family_8	46.4524	130.137	201.471	95.6942	1307.57	9155.54	339.515
Regulation and cell signaling	Regulation and cell signaling	LysR-family proteins	Chromosome initiation inhibitor_6	46.9314	182.682	324.192	109.055	1868.27	13388.7	483.725
Regulation and cell signaling			Regulatory protein, LysR-family	104.667	0	3.93847	0.938245	115.135	91.1889	141.953
Regulation and cell signaling			GTP-binding protein TypA/BipA	-5.17437	1318.68	987.857	1366.38	174.124	107.693	164.814
Regulation and cell signaling / Amino acids derivatives	Regulation and cell signaling / Alanine, serine and glycine	Orphan regulatory proteins	Glycine cleavage system transcriptional activator GcvA	-8.47619	644.651	689.928	602.972	74.1775	32.6008	40.7013
Respiration	Electron accepting reactions	Terminal cytochrome oxidases	Cytochrome O ubiquinol oxidase subunit I (EC 1.10.3.-)_2	-20.6924	543.907	391.327	530.578	13.3655	13.9648	16.0216
Respiration	Electron accepting reactions	Terminal cytochrome oxidases	Cytochrome O ubiquinol oxidase subunit III (EC 1.10.3.-)_2	-11.8464	198.606	130.582	190.331	11.5135	6.70794	9.05213
Respiration	Electron donating reaction	Succinate dehydrogenase	succinate dehydrogenase subunit	-9.4396	160.362	111.019	115.68	11.1251	5.19161	9.22543
Respiration	Electron accepting reactions	Terminal cytochrome oxidases	Cytochrome O ubiquinol oxidase subunit IV (EC 1.10.3.-)_2	-8.63543	138.241	92.6172	132.557	13.7769	4.52047	8.20374
Respiration	Electron accepting reactions	Terminal cytochrome oxidases	Cytochrome O ubiquinol oxidase subunit II (EC 1.10.3.-)_2	-7.26127	965.303	648.753	710.529	65.0153	66.2044	63.9892
Respiration	Respiration	Formate hydrogenase	NAD-dependent formate dehydrogenase beta subunit	5.2566	39.3108	39.1526	32.5575	91.0757	118.497	145.807
Respiration	Electron accepting reactions	Anaerobic respiratory reductases	Butyryl-CoA dehydrogenase (EC 1.3.99.2)_7	6.07574	129.156	109.714	109.366	264.696	812.346	119.055
Respiration	Respiration	Formate hydrogenase	NAD-dependent formate dehydrogenase gamma subunit	6.69604	176.715	170.863	163.255	472.303	677.327	913.05
Respiration	Electron accepting reactions	Anaerobic respiratory reductases	Butyryl-CoA dehydrogenase (EC 1.3.99.2)_8	9.03456	152.385	177.395	313.322	1362.44	1068.33	1212.28
Respiration	Respiration	Soluble cytochromes and functionally related electron carriers	Putative diheme cytochrome c-553_1	9.5766	51.6774	52.658	50.5924	119.811	663.24	30.338
RNA metaboilsm	RNA processing and modification	Ribonuclease H	Ribonuclease HII (EC 3.1.26.4)	-5.1448	642.718	275.763	420.602	76.5679	37.5177	50.4348
RNA metabolism	RNA processing and modification	Queuosine-archaeosine biosynthesis	Permease of the drug/metabolite transporter (DMT) superfamily_24	-7.14917	352.122	158.971	300.537	34.4685	14.5902	22.8676
RNA metabolism	RNA processing and modification	Queuosine-archaeosine biosynthesis	Permease of the drug/metabolite transporter (DMT) superfamily_22	-5.03579	160.867	93.3154	133.1	12.8588	14.1766	20.0104
RNA metabolism	Transcription	RNA polymerase bacterial	DNA-directed RNA polymerase alpha subunit (EC 2.7.7.6)	-4.96141	1071.05	1164.77	1259.27	191.776	113.174	142.76
RNA metabolism	RNA processing and modification	Queuosine-archaeosine biosynthesis	Permease of the drug/metabolite transporter (DMT) superfamily_26	-4.5577	171.734	122.046	146.056	24.4519	15.9199	19.903
Stress response	Stress response	Bacterial hemoglobins	diguanylate cyclase/phosphodiesterase (GGDEF & EAL domains) with PAS/PAC sensor(s)_1	-5.08733	147.29	92.9277	102.824	19.5319	10.2316	12.4741
Stress response	Osmotic stress	Osmotic stress cluster	Osmotically inducible lipoprotein B precursor	5.10471	1176.94	1159.29	869.603	5039.86	2078.91	3469.07
Stress response	Cold shock	Cold shock, CspA family of proteins	Cold shock protein CspG	5.4623	5368.22	6412.21	8369.76	17014.2	17800	32905.3
Stress response	Osmotic stress	Osmotic stress cluster	Osmotically inducible protein OsmY	7.38957	260.603	164.88	433.781	1305.21	1189.78	1423.05
Stress response	Osmotic stress	Osmotic stress cluster	Osmotically inducible protein C	8.63085	71.2219	79.026	118.417	517.704	402.258	532.642
Stress response	Oxidative stress	Redox-dependent regulation of nucleus processes	NAD-dependent protein deacetylase of SIR2 family_2	9.45974	28.8233	14.277	26.7345	21.8668	147.189	213.545
Stress response	Cold shock	Cold shock, CspA family of proteins	Cold shock protein CspA_1	10.6853	2242.78	4014.31	3867.83	18311.6	20902.9	27330.8
Stress response	Oxidative stress	Oxidative stress	Alkyl hydroperoxide reductase subunit C-like protein_2	11.7885	349.233	295.813	345.962	2363.51	2058.74	2797.58
Stress response	Stress response	Bacterial hemoglobins	diguanylate cyclase/phosphodiesterase (GGDEF & EAL domains) with PAS/PAC sensor(s)_17	13.7747	298.119	294.04	281.853	1026.99	5104.04	504.261
Stress response / Amino acids and derivatives	Detoxification / Lysine, threonine, methionine, and cysteine	Uptake of selenate and selenite / Cysteine biosynthesis	Sulfate and thiosulfate import ATP-binding protein CysA (EC 3.6.3.25)	10.4472	4.92269	5.18796	4.25382	24.9731	44.0994	23.4327
Stress response / Protein metabolism	Heat shock / Protein biosynthesis	Heat shock dnaK gene cluster extended / Ribosome biogenesis bacterial	Ribosomal protein L11 methyltransferase (EC 2.1.1.-)	-5.42819	863.489	662.562	816.934	102.839	79.0776	86.5614
Stress response / RNA metabolism	Periplasmic stress / transcription	Periplasmic stress response / Transcription initiation, bacterial sigma factors	Sigma factor RpoE negative regulatory protein RseA	4.72411	101.704	248.419	184.382	353.534	432.45	770.128
Sulfur metabolism	Organic sulfur assimilation	Alkanesulfonate assimilation / utilisation	Alkanesulfonates transport system permease protein_1	-5.714	261.818	247.773	269.678	41.7095	26.345	18.1101
Sulfur metabolism	Organic sulfur assimilation	Alkanesulfonate assimilation	ABC-type nitrate/sulfonate/bicarbonate transport system, permease component_1	6.26052	13.6198	22.1214	16.2956	54.4047	54.2457	94.2258
Sulfur metabolism	Organic sulfur assimilation	Alkanesulfonates utilization	Alkanesulfonates-binding protein_1	8.10032	12.1224	16.5456	11.6291	77.4405	38.2543	93.7923
Sulfur metabolism	Organic sulfur assimilation	Alkanesulfonate assimilation / utilisation	Alkanesulfonates ABC transporter ATP-binding protein / Sulfonate ABC transporter, ATP-binding subunit SsuB_1	9.0355	11.5912	19.0745	11.7319	53.6056	108.349	67.8751
Sulfur metabolism	Inorganic sulfur assimilation	Inorganic sulfur assimilation	Oxidoreductase probably involved in sulfite reduction	10.0794	13.6879	16.4734	9.86704	80.0255	76.7189	94.929
Sulfur metabolism	Organic sulfur assimilation	Alkanesulfonate assimilation	ABC-type nitrate/sulfonate/bicarbonate transport systems periplasmic components-like protein	11.7924	32.3418	81.6067	45.1607	402.804	312.643	469.885
Sulfur metabolism	Organic sulfur assimilation	Taurine utilization	Alpha-ketoglutarate-dependent taurine dioxygenase (EC 1.14.11.17)_2	22.7075	21.4559	20.2218	15.2549	191.389	245.546	352.045
Sulfur metabolism			COG2041: Sulfite oxidase and related enzymes	1516.23	40.9847	43.4798	41.2774	27331.2	36422.5	52129.6
Sulfur metabolism			Thiosulfate reductase cytochrome B subunit (membrane anchoring protein)	313.775	17.1879	12.728	19.0592	2983.75	2649.47	3930.5
Sulfur metabolism / Amino acids and derivatives	Inorganic sulfur assimilation / Lysine, threonine, methionine, and cysteine	Inorganic sulfur assimilation / cysteine biosynthesis	Sulfate transport system permease protein CysW	15.4197	5.08154	10.4222	8.84296	51.4272	78.2765	101.956
Sulfur metabolism / Amino acids and derivatives	Inorganic sulfur assimilation / Lysine, threonine, methionine, and cysteine	Inorganic sulfur assimilation / cysteine biosynthesis	Sulfate transport system permease protein CysT	27.0842	3.25499	2.59581	2.33614	23.8412	42.3829	74.3309
Sulfur metabolism / Amino acids ande derivatives	Inorganic sulfur assimilation / Lysine, threonine, methionine, and cysteine	Inorganic sulfur assimilation / cysteine biosynthesis	Sulfite reductase [NADPH] hemoprotein beta-component (EC 1.8.1.2)	13.6606	33.3932	73.8259	47.7217	397.108	379.453	543.3
Unknown function			putative secreted protein_5	-39.1355	577.349	230.297	250.419	4.91785	3.72087	7.71729
Unknown function			hypothetical protein_543	-38.2302	59.1977	25.3604	36.5175	0	0	1.68393
Unknown function			hypothetical protein_535	-28.2172	663.556	192.974	273.138	9.48919	5.81204	9.14131
Unknown function			hypothetical protein_541	-27.9879	96.0313	78.8827	77.8102	2.48494	1.522	1.38106
Unknown function			hypothetical protein_534	-25.1214	1003.5	776.249	741.066	35.5756	8.3197	21.5694
Unknown function			FMN-dependent NADH-azoreductase_1	-24.4191	169.578	144.704	152.384	4.84215	4.44865	2.39212
Unknown function			hypothetical protein_384	-14.3817	721.532	486.96	712.125	48.6214	18.5828	19.1679
Unknown function			Probable hydrolase	-13.7026	228.898	137.568	189.806	18.1906	3.53908	4.2818
Unknown function			Phenylpropionate dioxygenase and related ring-hydroxylating dioxygenases, large terminal subunit	-13.4591	489.109	359.241	486.131	37.2231	11.0763	16.081
Unknown function			unknown_2	-12.9636	155.692	81.5076	107.631	6.64243	3.71465	5.9923
Unknown function			hypothetical protein_125	-12.6963	59.1877	32.3417	36.649	2.3497	1.07938	2.6118
Unknown function			hypothetical protein_536	-12.6161	251.279	164.415	183.661	12.9992	3.41223	13.4171
Unknown function			hypothetical protein_546	-12.4839	122.729	70.848	79.4792	7.79112	2.38599	3.36785
Unknown function			hypothetical protein_537	-12.4671	82.566	47.2399	52.2175	5.5028	1.55557	1.88203
Unknown function			hypothetical protein_544	-10.2986	435.272	165.737	246.213	20.6493	10.348	20.1705
Unknown function			FIG00432251: hypothetical protein	-10.162	352.594	152.311	209.444	15.445	12.3839	15.295
Unknown function			putative fatty acid desaturase	-8.8697	281.013	158.601	221.175	17.0993	14.6624	14.1494
Unknown function			hypothetical protein_545	-8.30695	61.0422	35.0434	54.782	5.84913	2.26265	3.07969
Unknown function			hypothetical protein_124	-8.17895	385.185	169.037	362.385	26.6328	17.6926	25.2769
Unknown function			FIG00954712: hypothetical protein	-7.95207	45.0204	36.3484	32.2097	4.97883	1.71534	2.07532
Unknown function			hypothetical protein_532	-7.84309	173.354	77.3764	117.757	12.0798	6.93633	10.0704
Unknown function			hypothetical protein_496	-7.69678	194.527	147.121	138.896	12.6101	12.4248	13.4073
Unknown function			putative tautomerase	-7.40468	644.667	428.925	498.573	70.8208	38.05	26.2402
Unknown function			D-xylose transport ATP-binding protein XylG	-7.29974	1065.81	668.444	753.629	143.138	44.8946	37.079
Unknown function			Lipid-A-disaccharide synthase (EC 2.4.1.182)	-7.25955	600.411	322.788	496.617	52.9508	31.0179	38.8105
Unknown function			Outer membrane vitamin B12 receptor BtuB_5	-7.18917	148.171	70.3733	101.256	13.0194	10.232	4.18458
Unknown function			putative desaturase	-7.12083	470.015	173.308	283.489	34.4517	18.3786	28.4122
Unknown function			PUTATIVE PORIN B PRECURSOR OUTER (GLUCOSE PORIN) TRANSMEMBRANE PROTEIN	-6.99834	1321.26	1310.53	963.557	248.918	55.1891	46.0444
Unknown function			PTS system, cellobiose-specific IIC component (EC 2.7.1.69)	-6.92822	148.994	73.0392	137.797	8.4828	10.593	12.5415
Unknown function			FIG00464497: hypothetical protein	-6.91158	1514.3	803.793	1309.3	168.098	73.3402	95.3439
Unknown function			hypothetical protein AF1210	-6.48343	279.819	76.6014	283.864	21.7724	15.9347	23.1756
Unknown function			Protein containing domains DUF403	-6.45679	256.904	314.956	254.5	40.1757	22.0506	19.3321
Unknown function			hypothetical protein_252	-6.34539	193.001	148.613	149.397	20.3495	10.3319	17.8574
Unknown function			Optional hypothetical component of the B12 transporter BtuN_2	-6.33556	335.531	171.323	202.762	29.0141	18.6171	22.0123
Unknown function			Lignostilbene-alpha,beta-dioxygenase and related enzymes	-6.33373	190.735	112.778	155.22	18.4165	12.3054	14.3153
Unknown function			Protein containing transglutaminase-like domain, putative cysteine protease	-6.27989	192.57	156.78	129.599	24.273	13.025	10.7444
Unknown function			Ethidium bromide-methyl viologen resistance protein EmrE	-5.97082	528.999	461.405	745.777	71.698	44.2349	67.4795
Unknown function			FIG00975592: hypothetical protein	-5.93211	889.635	536.016	661.181	107.347	55.0673	61.1661
Unknown function			hypothetical protein_542	-5.90456	79.6273	56.7167	71.3773	6.83453	5.79611	9.05783
Unknown function			hypothetical protein_654	-5.86495	45.0982	28.0473	33.9675	3.71405	4.09467	3.30267
Unknown function			hypothetical protein_123	-5.81959	346.738	163.338	272.414	32.7843	24.0244	26.4633
Unknown function			23S rRNA (guanosine-2'-O-) -methyltransferase rlmB (EC 2.1.1.-)_1	-5.80667	218.427	87.616	123.993	20.5755	10.055	15.5715
Unknown function			Sugar kinases, ribokinase family	-5.74922	218.474	163.276	215.117	29.1505	11.7907	24.862
Unknown function			hypothetical protein_723	-5.70792	206.272	203.956	148.678	23.3012	15.1113	22.8533
Unknown function			putative ABC transport ATP-binding subunit_2	-5.66569	100.724	67.123	89.3941	13.9623	4.34168	10.2669
Unknown function			Putative cytoplasmic protein	-5.59308	244.372	130.378	192.261	20.6375	21.2889	20.1224
Unknown function			putative inner membrane protein_2	-5.56908	168.246	75.5588	108.61	15.1091	11.9485	11.905
Unknown function			hypothetical protein_533	-5.54708	487.881	236.182	277.241	51.811	24.1781	37.9364
Unknown function			Similar to hypothetical protein DUF454	-5.50293	342.871	387.313	372.57	81.006	31.7337	18.7397
Unknown function			putative inner membrane transport protein	-5.43523	256.864	145.388	175.97	26.4696	16.4781	23.3126
Unknown function			hypothetical protein_162	-5.37077	159.573	55.8586	101.694	13.6723	8.37418	14.3976
Unknown function			probable exported protein YPO4070_2	-5.34985	596.02	192.465	466.491	47.524	43.2119	52.2805
Unknown function			FIG152265: Sodium:solute symporter associated protein	-5.31658	1471.49	1181.66	2364.96	157.72	178.23	240.179
Unknown function			Glycosyl transferase, group 1 family protein_3	-5.18288	363.547	232.879	306.637	58.0199	18.276	36.1824
Unknown function			Membrane metalloprotease	-5.15505	33.8018	31.1497	41.3196	4.51978	3.93393	4.23069
Unknown function			FIG066100: Diguanylate cyclase (GGDEF domain) with PAS/PAC sensor	-5.1341	144.395	90.6533	109.859	19.4778	10.3393	12.2686
Unknown function			Binding-protein-dependent transport systems inner membrane component precursor_2	-5.06115	31.4982	34.3738	52.2519	5.68344	3.70564	5.09468
Unknown function			3-deoxy-D-manno-octulosonic-acid transferase (EC 2.-.-.-)	-5.02241	143.72	116.66	137.35	21.0293	11.5922	17.093
Unknown function			hypothetical protein_538	-4.7656	40.1097	31.7016	36.9572	5.89276	4.16453	4.03081
Unknown function			hypothetical protein in Cytochrome oxidase biogenesis cluster	-4.66402	233.233	165.79	192.937	33.0533	21.257	25.1058
Unknown function			D-aminoacylase (EC 3.5.1.81)_3	-4.65754	84.1488	55.4027	66.095	17.1305	4.71081	6.21757
Unknown function			Putative membrane protein_3	-4.62905	110.517	63.8231	65.0115	15.9278	5.43529	11.1286
Unknown function			putative chromate reductase	4.54448	620.236	596.391	669.123	2015.8	1488.34	1857.76
Unknown function			hypothetical protein_320	4.54602	10.2093	31.3609	38.6	91.7181	59.5231	81.776
Unknown function			hypothetical protein_512	4.55484	379.138	298.221	437.444	975.283	897.997	1254.6
Unknown function			probable amino acid permease	4.56394	56.0114	54.0877	54.0694	93.6091	133.128	227.517
Unknown function			5-dehydro-4-deoxyglucarate dehydratase (EC 4.2.1.41)	4.58935	36.3173	53.1236	112.317	364.596	146.779	102.68
Unknown function			FIG00431721: hypothetical protein	4.58983	56.6984	44.3813	72.3935	155.251	134.497	203.839
Unknown function			putative membrane protein_32	4.60284	6.69422	14.9196	9.02533	31.9946	27.5315	29.678
Unknown function			FUSARIC ACID RESISTANCE PROTEIN FUSB / FUSARIC ACID RESISTANCE PROTEIN FUSC	4.64677	25.2307	71.5122	38.6879	243.378	84.0566	93.3175
Unknown function			FIG002776: hypothetical protein	4.64816	237.386	238.26	242.318	426.985	520.922	1085.4
Unknown function			hypothetical protein_710	4.69472	619.331	525.051	674.948	1579.53	1650.36	1995.76
Unknown function			hypothetical protein_172	4.77505	33.9836	53.4234	63.6342	204.273	117.153	141.051
Unknown function			major facilitator superfamily MFS_1_1	4.86027	123.622	329.56	215.405	363.243	432.835	1214.02
Unknown function			Probable lipoprotein transmembrane	4.89587	221.347	351.897	244.882	720.273	658.512	1109.15
Unknown function			putative exported protein_9	4.89598	980.149	1553.39	1285.84	3635.08	3209.36	4797.21
Unknown function			Phospholipid-binding protein	4.94604	607.902	854.934	857.8	2159.67	1961.3	3004.7
Unknown function			3'-phosphoadenosine 5'-phosphosulfate sulfotransferase (PAPS reductase)/FAD synthetase and related enzymes_1	4.9466	8.46851	46.489	23.8201	88.5027	74.9112	83.573
Unknown function			hypothetical protein_128	4.9936	142.779	306.098	218.761	743.775	572.617	785.787
Unknown function			Siroheme synthase / Precorrin-2 oxidase (EC 1.3.1.76) / Sirohydrochlorin ferrochelatase (EC 4.99.1.4) / Uroporphyrinogen-III methyltransferase (EC 2.1.1.107)	5.03947	76.2547	55.8072	63.7281	136.845	173.46	287.951
Unknown function			putative DNA-binding protein (histone)	5.06994	1056.2	2225.2	1998.91	5895.75	5472.41	5331.1
Unknown function			putative capsular polysaccharide biosynthesis protein	5.08026	56.6498	34.4408	75.9519	153.491	148.116	220.596
Unknown function			Permeases of the major facilitator superfamily_18	5.08844	61.8207	95.8964	77.1198	261.367	204.124	284.482
Unknown function			hypothetical protein possibly connected to lactam utilization and allophanate hydrolase	5.11591	115.278	64.6444	107.572	538.868	201.727	220.037
Unknown function			ortholog of Bordetella pertussis (BX470248) BP2496	5.1598	152.827	192.233	191.535	415.213	486.417	793.063
Unknown function			Sensory box/GGDEF domain/EAL domain protein	5.17831	5.46795	4.72399	3.90131	28.0784	8.81492	11.6059
Unknown function			FIG00349646: hypothetical protein_1	5.29287	9.95669	59.6765	34.4952	141.39	109.32	100.937
Unknown function			probable iron binding protein from the HesB_IscA_SufA family	5.35862	1239.3	1825.15	1505.83	4084.99	4144.15	6885.03
Unknown function			hypothetical protein_207	5.39067	12.7015	25.911	21.4194	66.2469	72.6726	62.0353
Unknown function			putative membrane protein_21	5.40846	2.88233	4.73132	3.40114	16.7348	10.2499	11.905
Unknown function			putative lipoprotein_3	5.49275	368.073	200.541	348.023	845.22	888.052	1330.38
Unknown function			3-demethylubiquinone-9 3-methyltransferase	5.51802	98.7648	60.2309	111.727	334.972	228.086	371.537
Unknown function			FIG00954845: hypothetical protein	5.59573	77.8271	63.1965	61.9207	182.862	198.854	312.104
Unknown function			conserved hypothetical secreted protein	5.60052	66.6494	39.1888	68.578	402.387	104.7	145.173
Unknown function			hypothetical protein_491	5.60894	42.7593	94.9417	77.5459	168.865	446.035	85.3189
Unknown function			hypothetical protein_57	5.62128	4.23486	7.7076	5.95005	10.4907	18.0716	33.9624
Unknown function			Integral membrane protein, interacts with FtsH	5.65017	259.96	512.163	347.002	1004.16	1155.54	1733.38
Unknown function			hypothetical protein_383	5.65876	249.57	255.687	376.908	1540.37	822.993	844.463
Unknown function			(Y14336) putative extracellular protein containing predicted 35aa signal peptide	5.76325	23.4954	17.6053	18.7793	34.2581	138.876	21.1989
Unknown function			hypothetical protein_549	5.77236	287.922	316.289	447.904	1402.29	1124.24	1268.3
Unknown function			Candidate type III effector Hop protein_2	5.8871	15.2241	18.5488	9.31965	56.2079	61.635	39.3004
Unknown function			hypothetical protein_424	6.02999	59.4183	47.8698	64.4216	257.926	158.669	237.764
Unknown function			Polymyxin resistance protein ArnC, glycosyl transferase (EC 2.4.-.-)_2	6.14863	193.998	72.9807	153.884	92.8737	546.472	848.098
Unknown function			hypothetical protein_418	6.29451	15192.9	16541.3	16631.9	27966.6	50544.5	104495
Unknown function			Copper chaperone	6.34701	11.0991	17.2602	22.5389	90.2181	53.6789	63.0341
Unknown function			Serine/threonine protein phosphatase (EC 3.1.3.16)	6.39645	87.9975	69.6002	69.5533	191.413	251.225	436.993
Unknown function			Large exoproteins involved in heme utilization or adhesion	6.49747	27.3304	41.0737	25.2382	114.84	80.6	187.455
Unknown function			FIG00450153: hypothetical protein	6.55433	17.185	10.7977	19.2064	61.9216	40.0005	93.0263
Unknown function			hypothetical protein_327	6.56672	8.95626	13.4433	13.4059	37.8182	47.8708	59.7855
Unknown function			FIG00431532: hypothetical protein	6.58383	1301.37	1364.56	1684.28	7571.38	4189.45	6492.65
Unknown function			probable TonB-dependent receptor	6.67553	49.731	46.4179	45.6603	96.354	399.052	31.5947
Unknown function			Predicted transcriptional regulator for fatty acid degradation FadQ, TetR family	6.68134	333.642	448.577	920.129	2466.68	2151.94	2478.72
Unknown function			Putative luxR-family regulatory protein	6.77085	308.016	378.967	407.32	2652.95	1002.79	1220.66
Unknown function			Cyclopropane-fatty-acyl-phospholipid synthase-like protein, clusters with FIG005069	6.81137	4.23727	4.75898	4.06974	9.51262	34.0542	9.47988
Unknown function			putative lipoprotein_15	7.06324	764.485	452.753	1185.04	4130.92	2620.44	3928.22
Unknown function			FIG034376: Hypothetical protein_3	7.73641	0.354115	8.97409	4.47007	48.7955	17.1261	7.61776
Unknown function			hypothetical protein_171	7.82468	83.1703	66.5006	99.8861	553.458	328.472	359.237
Unknown function			putative membrane protein_16	7.86051	53.5598	59.1474	62.6781	276.188	227.929	354.988
Unknown function			putative bacterioferritin-associated ferredoxin	7.90411	118.271	226.457	135.032	893.525	645.928	857.727
Unknown function			Lead, cadmium, zinc and mercury transporting ATPase (EC 3.6.3.3) (EC 3.6.3.5); Copper-translocating P-type ATPase (EC 3.6.3.4)_4	7.91793	29.8871	39.9789	31.3018	118.284	153.449	217.837
Unknown function			putative membrane protein_37	7.95477	200.844	345.807	275.158	1369.59	1040.02	1699.65
Unknown function			Permeases of the major facilitator superfamily_4	8.02265	48.8242	70.3231	54.3117	145.215	267.035	426.135
Unknown function			FIG024285: Hypothetical protein	8.10649	9.07933	12.9489	25.1526	118.817	70.1094	57.6647
Unknown function			Fe2+-dicitrate sensor, membrane component_9	8.26808	20.4618	30.4395	23.6154	40.0078	271.433	28.9762
Unknown function			Probable transmembrane protein_10	8.31791	92.6503	170.27	109.729	369.472	535.832	985.014
Unknown function			hypothetical protein_76	8.38136	71.4131	50.3093	53.5544	159.301	584.863	76.8547
Unknown function			glycosyl transferase	8.40908	158.802	215.286	113.541	490.721	502.8	1531.65
Unknown function			putative membrane protein_30	8.55206	1.39616	2.37009	2.66176	15.0177	10.2434	11.5079
Unknown function			Zinc-regulated outer membrane receptor_2	8.85887	17.5195	20.9217	19.8775	206.713	62.3395	76.16
Unknown function			putative membrane protein_20	9.00455	5.65167	22.786	12.7339	111.681	52.8895	77.5549
Unknown function			Amidase( EC:3.5.1.4 )	9.11463	194.513	226.752	213.431	761.7	2158.31	383.935
Unknown function			Two-component response regulator_3	9.41047	113.135	108.541	133.604	445.043	626.99	950.54
Unknown function			putative membrane protein_40	9.4603	3605.3	2250.57	6599.2	17171.9	20438.4	34094.6
Unknown function			putative autotransporter protein_1	9.80078	20.1611	17.2236	19.8431	143.488	85.4498	127.852
Unknown function			hypothetical protein_314	9.94343	236.644	511.239	225.079	1949.83	1321.15	2850.8
Unknown function			FIG141751: hypothetical protein in PFGI-1-like cluster_1	10.0306	283.325	548.357	728.247	2053.57	5491.72	1526.62
Unknown function			Probable transmembrane protein_5	10.2237	10.3842	10.8042	13.9722	54.456	75.2842	91.0837
Unknown function			probable membrane protein NMA1176	10.4548	60.3836	110.675	70.526	426.922	457.812	675.726
Unknown function			FIG01200701: possible membrane protein_3	11.2408	56.3451	62.9284	46.4648	365.334	317.337	474.012
Unknown function			probable nucleotide pyrophosphatase homolog	11.2654	13.9014	19.872	14.0335	52.2086	237.288	12.01
Unknown function			Predicted D-glucarate or D-galactorate regulator, GntR family_2	11.5597	133.3	419.067	168.505	1367.53	1185.08	2679.85
Unknown function			protein of unknown function DUF932_2	11.8398	5.05261	7.7603	14.0786	23.669	143.373	11.5939
Unknown function			Protein yjbJ	11.9973	3901.34	2973.23	8417.97	37797.1	34274	41484.1
Unknown function			hypothetical protein_695	12.0417	355.675	489.174	1059.54	3875.22	4343.9	5890.37
Unknown function			Poly(3-hydroxybutyrate) depolymerase	12.1956	39.139	32.5615	26.2544	83.4901	541.267	24.6976
Unknown function			putative exported protein_32	12.4506	83.339	153.6	107.523	757.115	778.388	1119.59
Unknown function			Sigma factor, ECF subfamily_2	12.5938	5.07028	8.5175	9.04394	21.2608	128.017	11.2708
Unknown function			ortholog of Bordetella pertussis (BX470248) BP2782	12.8368	327.101	344.962	371.735	4281.02	1762.51	2668.52
Unknown function			ortholog of Bordetella pertussis (BX470248) BP3011	12.9355	21.1875	16.9888	14.1366	206.15	123.507	102.955
Unknown function			hypothetical protein_572	13.0024	40.9002	73.8832	54.0781	464.86	404.605	503.915
Unknown function			hypothetical protein_469	13.6555	2.24458	2.47317	1.39259	7.40373	39.7019	2.68721
Unknown function			FIG111991: hypothetical protein	13.93	0.829956	8.98683	2.18645	42.6618	32.1115	34.2799
Unknown function			L-carnitine dehydratase/bile acid-inducible protein F_2	14.344	3.19747	3.89371	4.21173	8.76953	79.2693	3.30165
Unknown function			Aliphatic amidase AmiE (EC 3.5.1.4)_2	14.882	9.18948	19.054	10.2422	52.7522	254.192	15.0849
Unknown function			Manganese transport protein MntH_1	15.1744	32.0803	30.7785	36.3526	388.783	224.596	345.393
Unknown function			AAA family ATPase, possible cell division control protein cdc48	15.327	2.43817	3.3703	2.54249	13.401	57.9184	4.19601
Unknown function			hypothetical protein_226	15.3298	64.7687	87.7342	63.1953	623.96	581.785	844.244
Unknown function			Esterase/lipase_1	15.3477	63.5193	67.3694	69.865	24.1865	577.377	1193.58
Unknown function			hypothetical protein_711	15.4419	10.6845	12.8	18.2958	33.0849	119.153	233.891
Unknown function			FIG00553873: hypothetical protein_2	15.7446	55.6001	83.3708	54.1018	208.449	1392.1	60.2689
Unknown function			hypothetical protein_269	16.6396	32.2712	21.8195	44.664	33.6717	341.287	579.525
Unknown function			FIG01200701: possible membrane protein_1	20.5884	107.884	114.216	97.7054	721.341	1298.2	1923.07
Unknown function			protein of unknown function DUF932_1	20.7396	118.282	362.976	249.466	929.01	6639.94	819.571
Unknown function			putative exported protein_18	21.7305	705.529	794.156	537.72	2373.71	20616.3	819.595
Unknown function			Sorbitol-6-phosphate 2-dehydrogenase (EC 1.1.1.140)	23.0642	0.899565	3.10869	0.822856	14.6241	51.6099	2.83823
Unknown function			Long-chain fatty acid transport protein	23.2594	311.75	333.336	207.431	1987.21	8582.63	376.614
Unknown function			FIG00460174: hypothetical protein_2	23.3386	2.02351	3.20503	0.832932	11.3569	68.7204	3.4824
Unknown function			NAD(FAD)-utilizing dehydrogenase, sll0175 homolog	24.0459	223.026	201.489	153.6	667.188	6495.74	269.144
Unknown function			hypothetical protein_111	25.2419	12.9705	30.0812	15.9458	137.159	660.012	37.1286
Unknown function			FIG041388: hypothetical protein in PFGI-1-like cluster_1	26.4002	7.01829	7.56851	8.0316	73.9827	189.468	90.7156
Unknown function			Hypothetical protein PA1329	26.476	16.0348	54.877	22.1924	151.115	1142.41	67.1886
Unknown function			uncharacterized secreted protein	28.3344	38.2732	121.821	77.5736	664.303	2894.48	232.412
Unknown function			Leucyl aminopeptidase (aminopeptidase T)	30.1602	130.656	144.764	109.9	622.311	5451.76	176.238
Unknown function			possible serine protease/outer membrane autotransporter( EC:3.4.- )	30.8909	27.8865	54.5869	26.7572	225.39	1573.65	48.8868
Unknown function			hypothetical protein_636	32.7255	191.159	375.904	181.021	1612.57	11263.6	505.138
Unknown function			Legionaminic acid biosynthesis protein PtmF	32.8392	0.344278	1.32194	1.51162	39.6222	15.018	22.1197
Unknown function			Permeases of the major facilitator superfamily_10	35.2159	101.77	122.044	81.6273	531.952	5075.97	171.548
Unknown function			hypothetical protein_119	37.0472	3.96608	4.56863	3.26509	63.7083	174.888	20.4765
Unknown function			probable short chain dehydrogenase	40.2781	268.457	344.962	115.35	2552.54	13065.1	479.054
Unknown function			hypothetical protein_367	47.6147	114.53	141.976	44.0888	687.437	6777.7	204.212
Unknown function			Putative iron reductase in siderophore [Alcaligin] cluster	47.9085	8.4775	11.8213	7.67297	49.0477	654.138	23.804
Unknown function			hypothetical protein_107	55.8755	4.7915	13.0259	1.0519	75.6689	494.544	22.0994
Unknown function			Acyl-CoA dehydrogenase (EC 1.3.8.7)_1	59.1966	142.401	279.377	40.7421	1688.86	12779.6	428.84
Unknown function			hypothetical protein_282	70.5794	65.8653	42.4812	64.9687	350.576	2532.22	4204.22
Unknown function			Manganese transport protein MntH_2	70.6156	178.933	258.677	50.1857	1574.37	16397.6	489.478
Unknown function			hypothetical protein_659	86.9117	55.9218	112.56	26.4472	792.823	8145.83	208.861
Unknown function			Peptidase, M48 family	90.1208	18.1291	35.249	6.21077	280.866	2564.98	76.3101
Unknown function			hypothetical protein_134	91.0846	40.1252	103.404	15.184	937.64	6767.91	221.514
Unknown function			hypothetical protein_407	138.999	224.487	288.038	233.658	32330	15260	19543.1
Unknown function			hypothetical protein_725	190.796	12.2429	10.4466	10.7011	1259.82	1055.21	1680.11
Unknown function			Mobile element protein_2	468.984	0.234587	0.540453	0.514999	156.541	130.472	221.641
Unknown function			Integrase_3	544.086	0.711618	0.409865	0.781123	421.98	209.028	196.254
Unknown function		RES domain. This presumed protein contains 3 highly conserved polar groups that could form an active site. These are an arginine, glutamate and serine	FIG00958223: hypothetical protein	1132.2	0.590191	0.339927	0.323918	472.421	275.361	478.395
Unknown function		Pentapeptide	FIG01055690: hypothetical protein	2649.45	10.8166	14.7961	7.42066	8992.61	15676.5	28687.5
Virulence, disease and defence			Type III secretion inner membrane protein (YscS,homologous to flagellar export components)	-29.0115	84.3907	55.8245	61.9084	1.94049	0	2.15694
Virulence, disease and defence			Type III secretion bridge between inner and outermembrane lipoprotein (YscJ,HrcJ,EscJ, PscJ)	-18.1592	146.355	66.0689	87.127	5.71595	1.87552	2.49603
Virulence, disease and defence			Type III secretion chaperone protein for YopD (SycD)_2	-17.9304	39.0411	19.5416	26.0187	1.0794	0	1.59973
Virulence, disease and defence			Type III secretion inner membrane protein (YscU,SpaS,EscU,HrcU,SsaU, homologous to flagellar export components)	-17.0311	207.157	148.768	184.633	8.54647	2.963	8.2451
Virulence, disease and defence			Type III secretion cytoplasmic protein (YscL)	-14.6334	183.34	103.031	150.841	5.83636	5.36207	7.07714
Virulence, disease and defence			Type III secretion inner membrane protein (YscQ,homologous to flagellar export components)	-13.5599	92.8518	51.9919	61.1071	3.67794	1.46915	4.0882
Virulence, disease and defence			Type III secretion inner membrane protein (YscR,SpaR,HrcR,EscR,homologous to flagellar export components)	-11.0522	86.5358	58.9645	77.4178	5.42118	3.79476	3.15642
Virulence, disease and defence			Type III secretion inner membrane channel protein (LcrD,HrcV,EscV,SsaV)	-9.59248	113.877	76.3268	81.6273	5.00233	4.52047	7.83913
Virulence, disease and defence			Type III secretion host injection and negative regulator protein (YopD)	-8.46289	46.8168	48.302	37.2387	5.46263	2.31633	1.8683
Virulence, disease and defence			Type III secretion inner membrane protein (YscD,homologous to flagellar export components)	-7.81222	146.289	97.7745	114.869	11.8522	6.46162	10.2788
Virulence, disease and defence			Type III secretion inner membrane protein (YscT,HrcT,SpaR,EscT,EpaR1,homologous to flagellar export components)	-4.76728	94.5565	59.1932	88.9646	10.1336	7.92353	13.4209
Virulence, disease and defence	Resistance to antibiotics and toxic compounds	Multidrug resistance efflux pumps	RND efflux system, outer membrane lipoprotein CmeC_5	6.10764	57.6513	47.5113	60.0003	117.035	180.37	311.238
Virulence, disease and defence	Resistance to antibiotics and toxic compounds	Multidrug resistance efflux pump	Macrolide export ATP-binding/permease protein MacB (EC 3.6.3.-)	7.45887	114.735	63.3608	127.754	194.478	442.231	712.602
Virulence, disease and defence	Resistance to antibiotics and toxic compounds	Arsenic resistance	Arsenic resistance protein ArsH	8.21033	235.23	332.205	451.649	1024.09	2913.73	885.007
Virulence, disease and defence			Organic hydroperoxide resistance protein_1	10.7174	38.3088	79.1722	88.0586	352.384	719.298	230.361
Virulence, disease and defence	Resistance to antibiotics and toxic compounds	Zinc resistance	Response regulator of zinc sigma-54-dependent two-component system_2	14.1291	1.19942	2.07246	1.024	6.39642	28.4352	3.21093
Virulence, disease and defence			Virulence protein	15.8208	996.943	664.643	1362.88	7279.24	9598.51	12009.4
Virulence, disease and defence	Resistance to antibiotics and toxic compounds	Zinc resistance	Response regulator of zinc sigma-54-dependent two-component system_5	20.5397	18.5076	63.382	57.6516	226.399	1240.18	138.021
Virulence, disease and defence	Resistance to antibiotics and toxic compounds	Multidrug resistance efflux pumps	RND efflux system, membrane fusion protein CmeA_2	21.1042	63.4166	71.6877	49.4744	190.111	1832.76	71.1179
Virulence, disease and defence	Resistance to antibiotics and toxic compounds	Beta-lactamase	Beta-lactamase (EC 3.5.2.6)_1	23.3169	2.23838	5.15689	2.32051	92.8015	36.7927	25.6813
Virulence, disease and defence	Resistance to antibiotics and toxic compounds	Multidrug resistance efflux pump	Macrolide-specific efflux protein MacA	23.4943	139.409	79.2642	168.318	504.993	1919.29	2875.79
21+ 189
